# Supplementary material for: Low-Cost and Recyclable Photocatalysts: Metal Oxide/Polymer Composites Applied in the Catalytic Breakdown of Dyes
Source: MDPI journal article supplement (doi:10.3390/photochem2030047), 2022-08-24
Supplement: s1 [file photochem-1859892-supplementary.pdf › photochem-1859892-supplementary.pdf]

# Supporting Information

## Low-Cost and Recyclable Photocatalysts: Metal Oxide/Polymer Composites Applied in the Catalytic Breakdown of Dyes

Timur Borjigin <sup>1,2</sup>, Michael Schmitt <sup>1,2,\*</sup>, Fabrice Morlet-Savary <sup>1,2,\*</sup>, Pu Xiao <sup>3,\*</sup> and Jacques Lalevée <sup>1,2,\*</sup>

<sup>1</sup> Université de Haute-Alsace, CNRS, IS2M UMR 7361, F-68100 Mulhouse, France

<sup>2</sup> Université de Strasbourg, France

<sup>3</sup> Research School of Chemistry, Australian National University, Canberra, ACT 2601, Australia

\* Correspondence: michael.schmitt@uha.fr (M.S.); fabrice.morlet-savary@uha.fr (F.M.-S.); pu.xiao@anu.edu.au (P.X.); jacques.lalevee@uha.fr (J.L.)

**Table S1.** The apparent absorbance limits of the composites.

| Composites                       | Apparent absorbance limits (eV) |
|----------------------------------|---------------------------------|
| 1 wt% ZnO/poly-PEG               | 3.4                             |
| 2 wt% ZnO/poly-PEG               | 3.3                             |
| 3 wt% ZnO/poly-PEG               | 3.3                             |
| 4 wt% ZnO/poly-PEG               | 3.2                             |
| 5 wt% ZnO/poly-PEG               | 3.2                             |
| 1 wt% CeO <sub>2</sub> /poly-PEG | 3.6                             |
| 2 wt% CeO <sub>2</sub> /poly-PEG | 3.6                             |
| 3 wt% CeO <sub>2</sub> /poly-PEG | 3.5                             |
| 4 wt% CeO <sub>2</sub> /poly-PEG | 3.5                             |
| 5 wt% CeO <sub>2</sub> /poly-PEG | 3.4                             |
| 6 wt% CeO <sub>2</sub> /poly-PEG | 3.4                             |

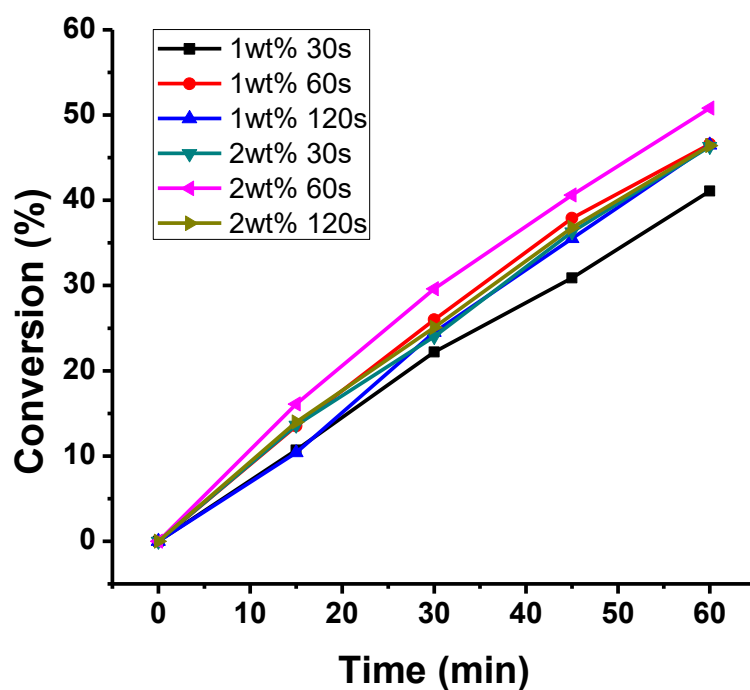

**Figure S1.** The Acid Black degeneration by 1 wt% ZnO/polymers and 2 wt% ZnO/polymers from syntheses using different irradiation times.  $[AB]_0=15\text{ppm}$ ,  $\text{pH}=7$ , irradiation source: UV Lamp.

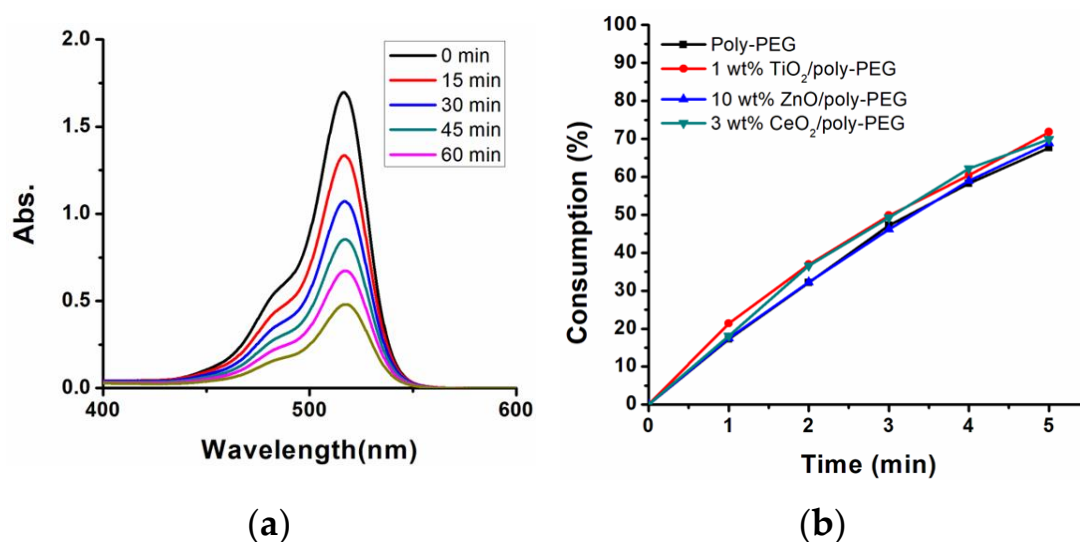

**Figure S2.** UV-visible absorption spectra of Eosin-Y water solutions under air during the photocatalytic degradation process under UV lamp irradiation in the presence of (a) 10 wt% ZnO/poly-PEG composite.  $[\text{Eosin-Y}]_0 = 15 \text{ ppm}$ ,  $\text{pH} = 7$ . Degradation plot of Eosin-Y (15 ppm) under Omnicure lamp irradiation (b) in the presence of Poly-PEG, 1 wt%  $\text{TiO}_2$ /poly-PEG composite, 10 wt% ZnO/poly-PEG composite and 3wt%  $\text{CeO}_2$ /poly-PEG composite.
